# Supplementary material for: Effect of peracetylation on the conformation of γ-cyclodextrin
Source: Royal Society of Chemistry journal article supplement (doi:10.1039/b616681d), 2007-01-01
Supplement: b616681d.pdf [file b616681d.pdf]

## **Effect of Peracetylation on the Conformation of $\gamma$ -Cyclodextrin**

**Mino R. Caira, Giampiero Bettinetti, Milena Sorrenti,  
Laura Catenacci and Dyanne Cruickshank**

(a) Representative Thermogravimetric traces, Differential Scanning Calorimetric traces and XRPD patterns for isostructural solvates of peracetylated  $\gamma$ -Cyclodextrin:

**1** TA $\gamma$ CD·2(ethanol)·H<sub>2</sub>O

**2** TA $\gamma$ CD·1.5(2-propanol)·H<sub>2</sub>O

**3** TA $\gamma$ CD·1.5(acetone)

**4** TA $\gamma$ CD·1.5(*n*-propanol)

**5** TA $\gamma$ CD·3(ethanol)

(b) Tabulated summary of thermal data

# 1 TA $\gamma$ CD·2(ethanol)·H<sub>2</sub>O

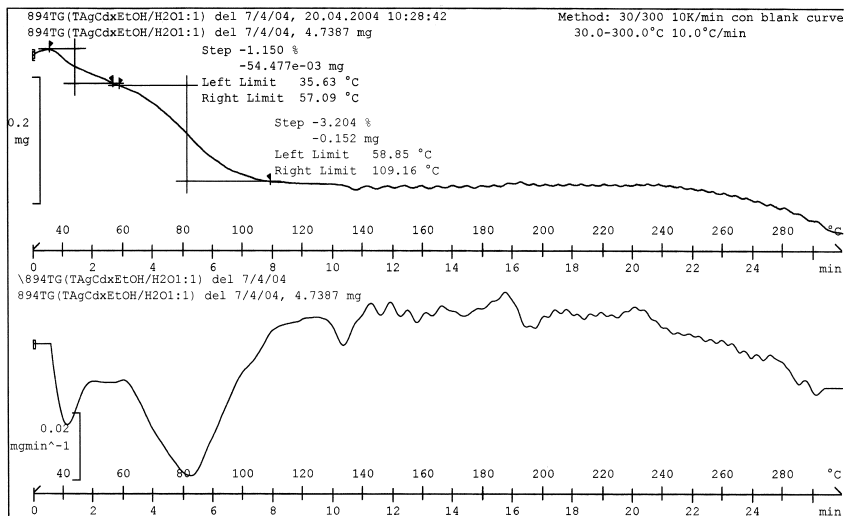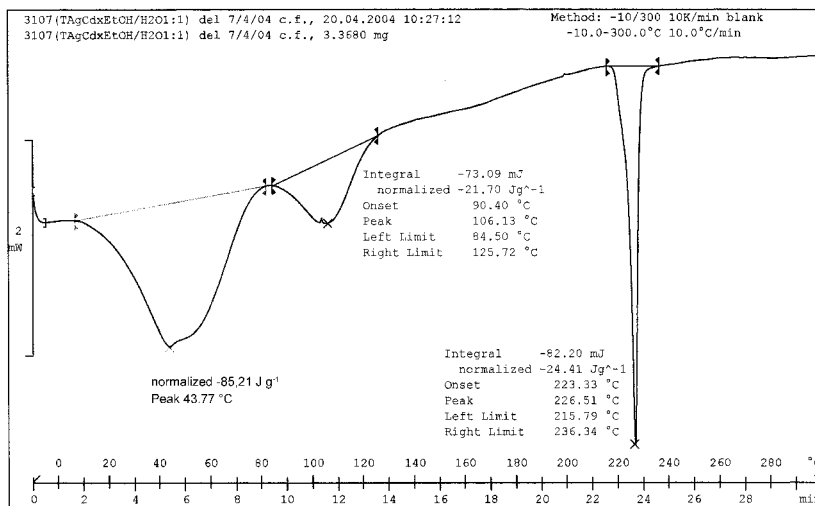

Sample identification: S TA $\gamma$ cdxEtOH/H2O 1:1

13-May-2004 9:15

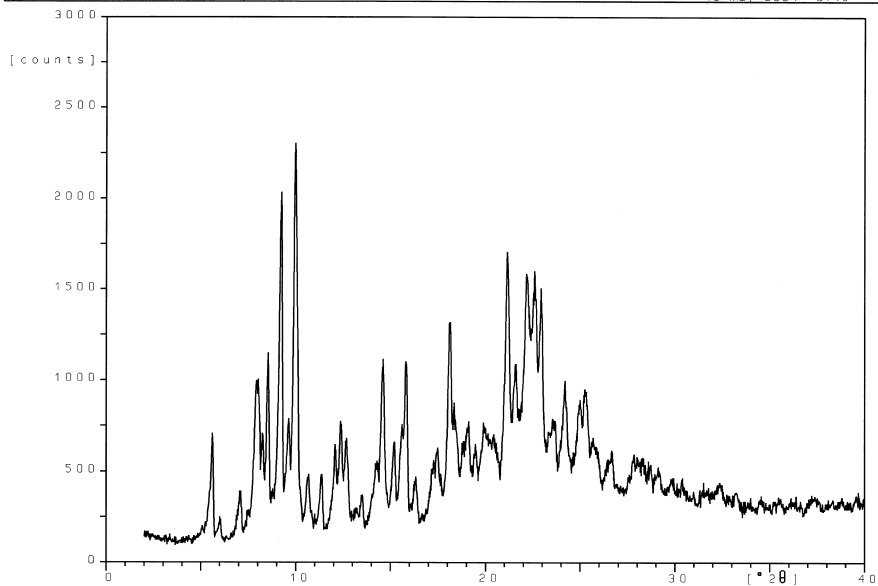

GR673\_RD

## 2 TAγCD·1.5(2-propanol)·H<sub>2</sub>O

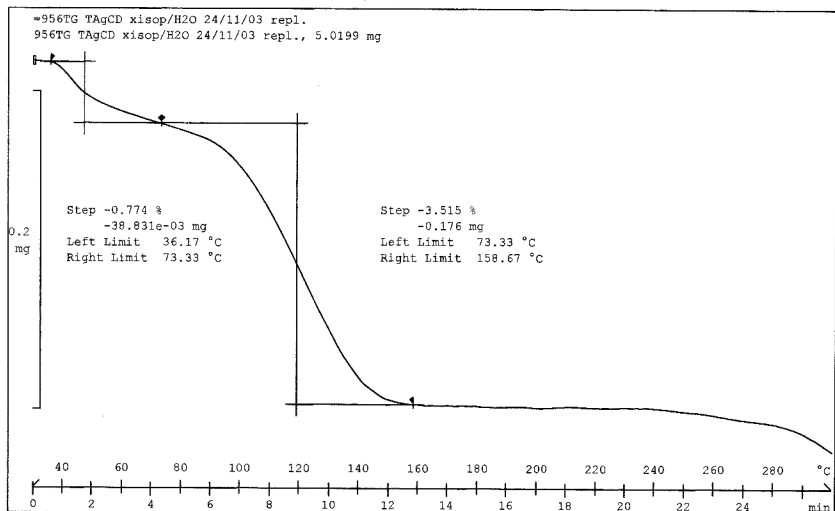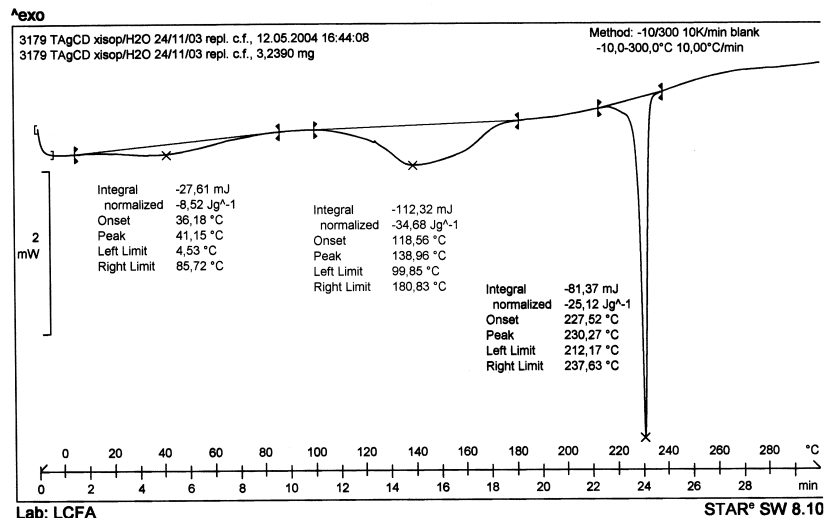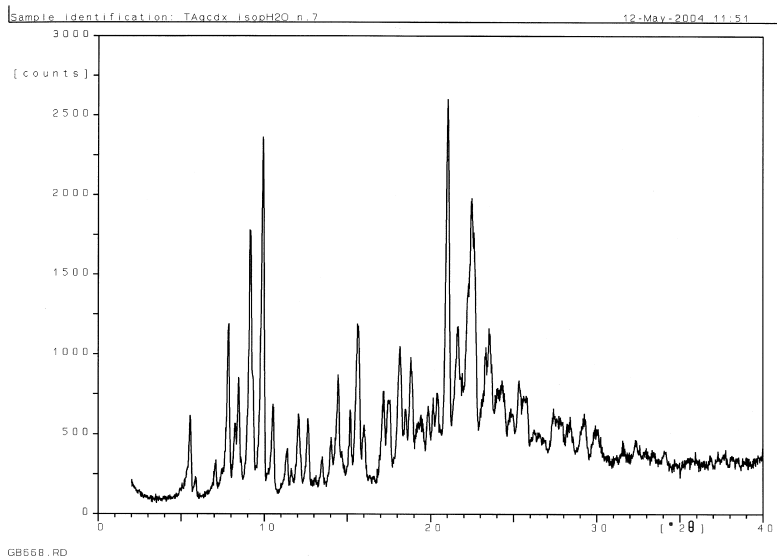

### 3 TA $\gamma$ CD·1.5(acetone)

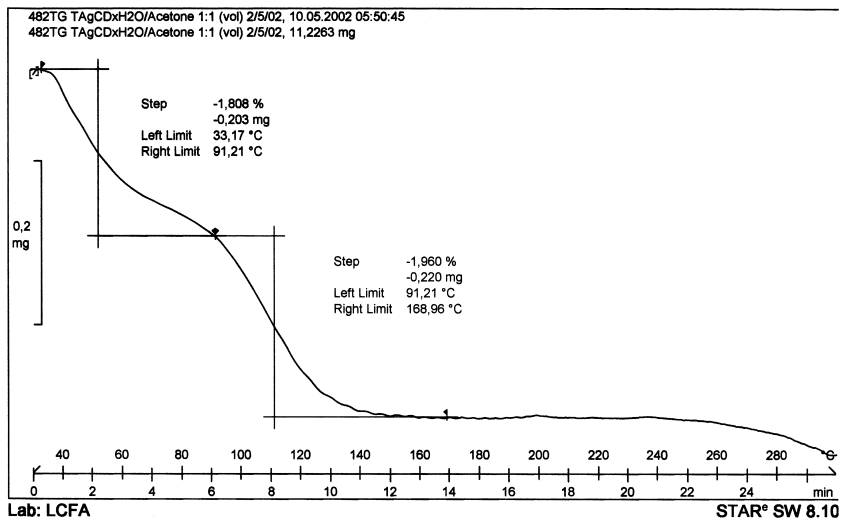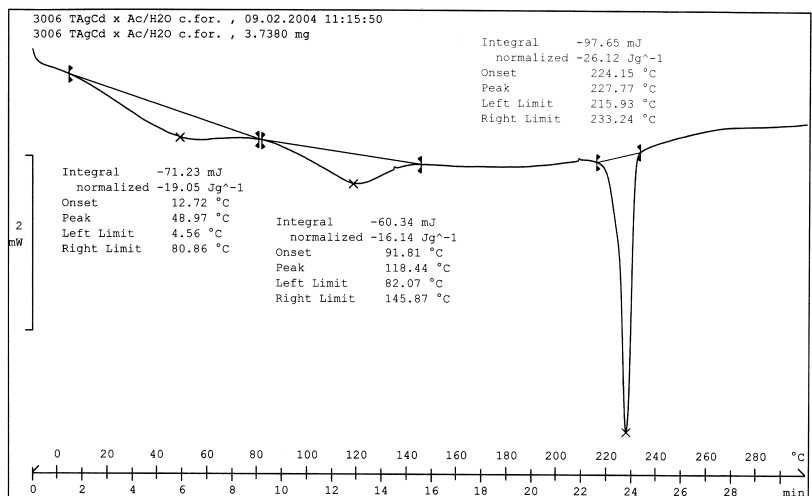

Sample identification: 3 TA $\gamma$ cdxACET/H<sub>2</sub>O 1:1 13-May-2004 9:15

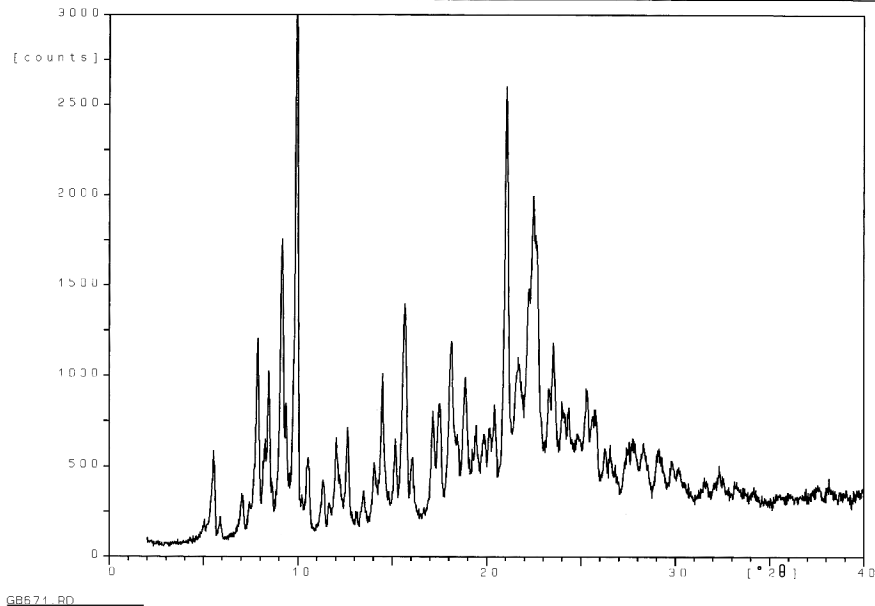

# 4 TAγCD·1.5(*n*-propanol)

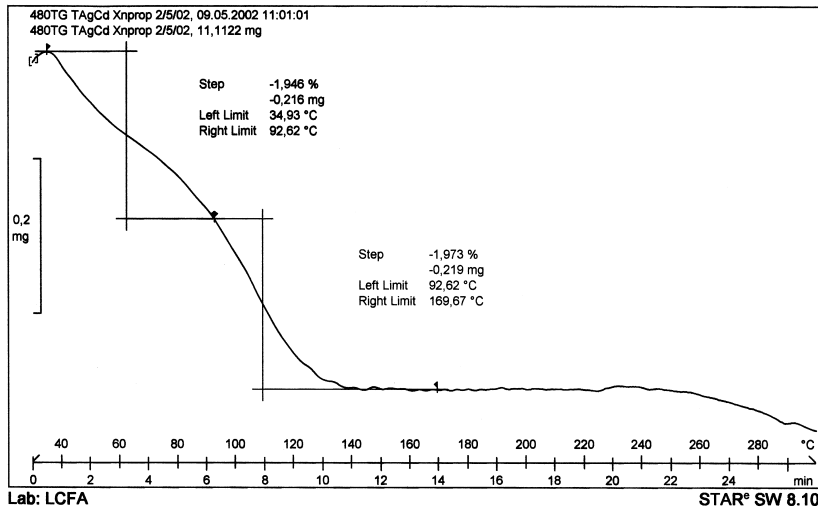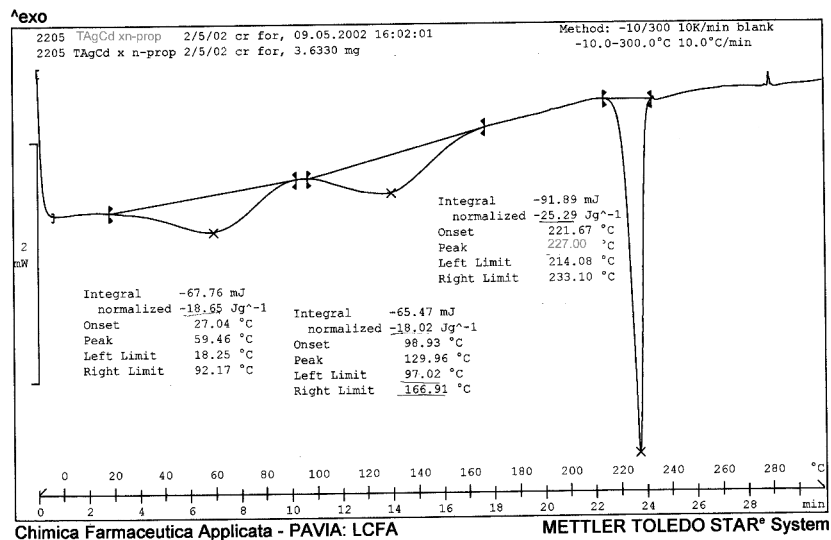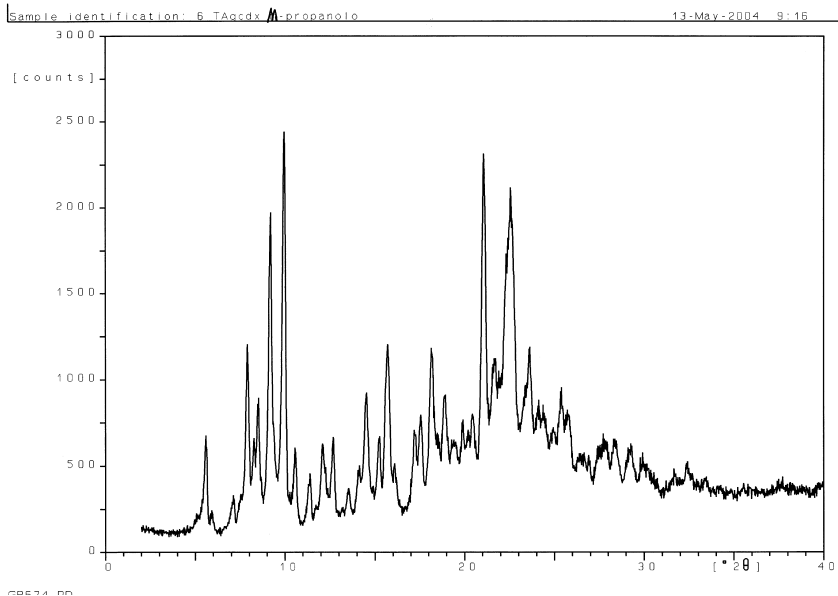

## 5 TA $\gamma$ CD-3(ethanol)

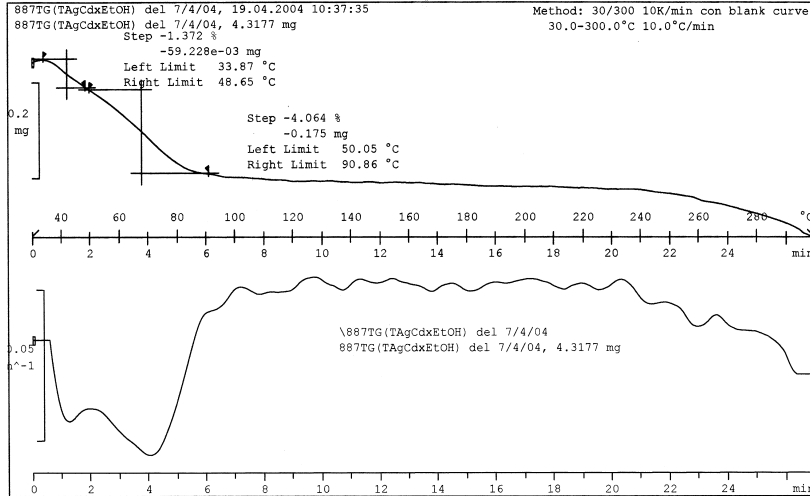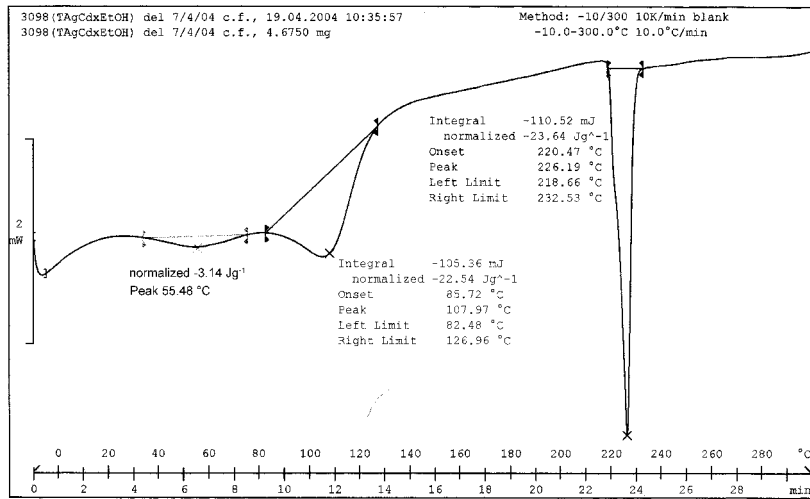

Sample identification: 17 TAqCd x EtOH

18-Nov-2003 9:15

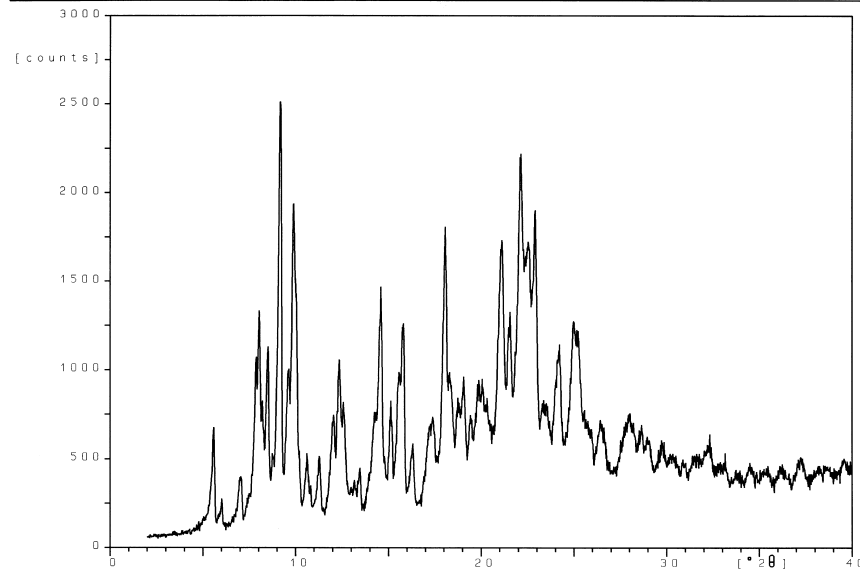

GB638\_RD

TABLE: Summary of thermal data for solvates 1-5

| <b>Solvate</b> | <b>Solvent of crystallization</b>                              | <b>Step 1 mass loss<sup>a</sup> (%)</b> | <b>Step 2 mass loss<sup>a</sup> (%)</b> | <b>Total mass loss (%)</b> |
|----------------|----------------------------------------------------------------|-----------------------------------------|-----------------------------------------|----------------------------|
| <b>1</b>       | (a) Ethanol/water 1/1 (v/v)<br>(b) EtOH/water 96.4% by wt EtOH | 1.1                                     | 3.2                                     | 4.3                        |
| <b>2</b>       | 2-propanol/water 4/1 (v/v)                                     | 0.77                                    | 3.5                                     | 4.27                       |
| <b>3</b>       | Acetone/water 1/1 (v/v)                                        | 1.8                                     | 2.0                                     | 3.8                        |
| <b>4</b>       | <i>n</i> -propanol                                             | 1.9                                     | 1.97                                    | 3.87                       |
| <b>5</b>       | EtOH (100%)                                                    | 1.4                                     | 4.1                                     | 5.5                        |

<sup>a</sup>Averages of triplicate determinations
